# Supplementary material for: Non-invasive assessment of skeletal muscle fibrosis in mice using nuclear magnetic resonance imaging and ultrasound shear wave elastography
Source: PubMed Central journal article supplement (PMC7801669; doi:10.1038/s41598-020-78747-8), 2021-01-11
Supplement: 41598_2020_78747_MOESM1_ESM.pdf [file 41598_2020_78747_MOESM1_ESM.pdf]

Title:

**Non-invasive assessment of skeletal muscle fibrosis in mice using nuclear magnetic resonance imaging and ultrasound shear wave elastography**

Authors:

Aurea B. Martins-Bach<sup>1</sup>, Damien Bachasson<sup>2</sup>, Ericky C. A. Araujo<sup>1</sup>, Lucas Soustelle<sup>3</sup>, Paulo Loureiro de Sousa<sup>3</sup>, Yves Fromes<sup>1</sup>, Pierre G. Carlier<sup>1</sup>

<sup>1</sup>AIM & CEA NMR Laboratory, Neuromuscular Investigation Center, Institute of Myology, Paris, France

<sup>2</sup>Neuromuscular Physiology Laboratory, Neuromuscular Investigation Center, Institute of Myology, Paris, France

<sup>3</sup>Université de Strasbourg, CNRS, ICube, FMTS, Strasbourg, France

Supplementary Figure S1.

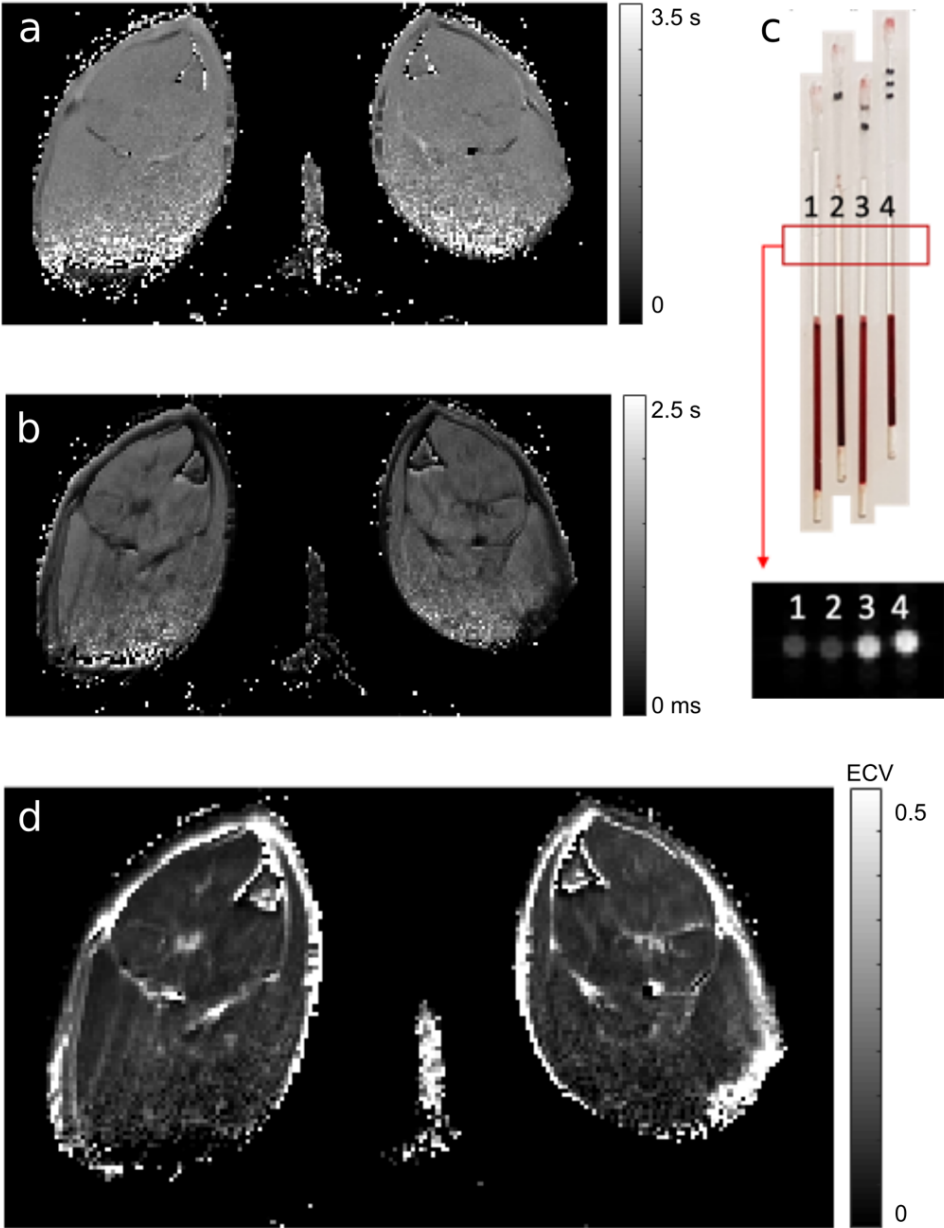

Supplementary Figure S1. Representative muscle and plasma  $T_1$  maps, and estimated ECV map. (a) Native  $T_1$  map (before injection of Gd-CA) estimated from *in vivo* imaging of mouse legs. (b)  $T_1$  map from the same animal, 1-hour after intraperitoneal injection of Gd-CA. (c) Blood samples were collected by tail puncture before MRI (samples 1-2) and after the last  $T_1$ -map post Gd-CA injection (samples 3-4). Samples

were centrifuged, and plasma was imaged using the same protocol as for in vivo  $T_1$  mapping (bottom). Samples were taken in duplicate. (d) ECV map, estimated from  $T_1$  values pre- and post- Gd-CA injection for tissue and plasma.

Supplementary Figure S2.

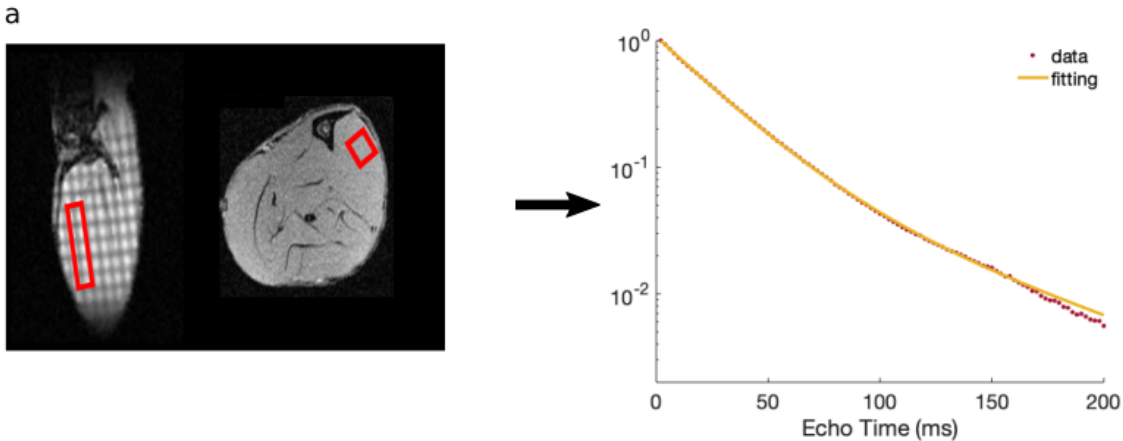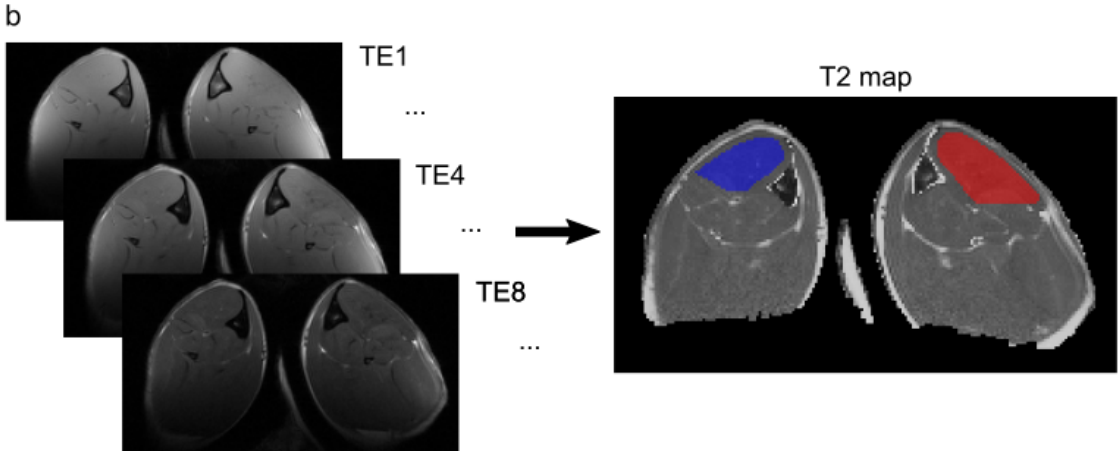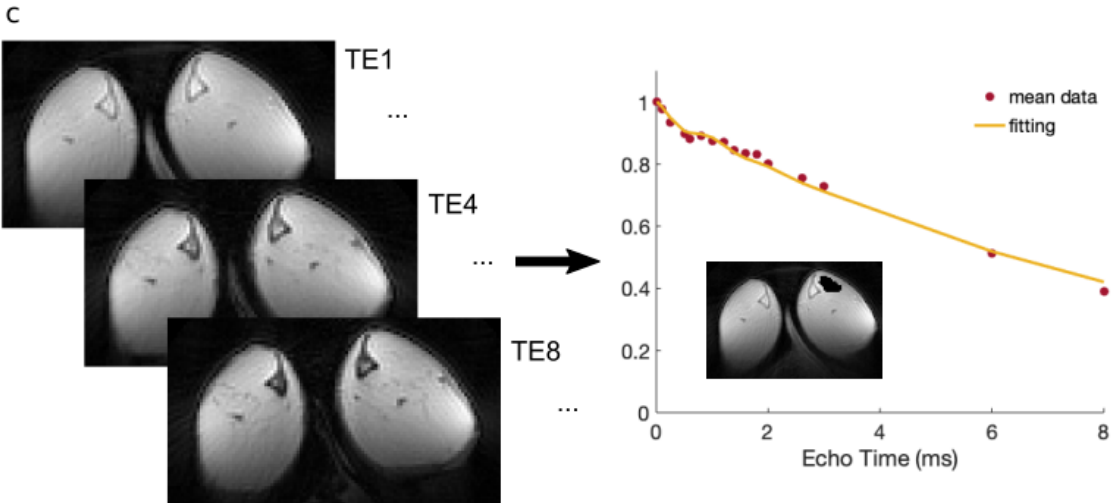

Supplementary Figure S2. *Representative images and ROI selection for  $T_2$  and  $T_2^*$  measurements.* (a) ISIS-CPMG signal was acquired from a volume positioned over the tibialis cranialis muscle (red parallelepiped, sagittal and axial views). On the right, ISIS-CPMG signal decay as a function of echo time (red dots), and the fitted tri-exponential model (orange line). (b) Representative images acquired with MSME at different echo times (left, TE1 = 5.15 ms, TE4 = 20.6 ms, TE8 = 41.2 ms), and the corresponded  $T_2$  map (right). Two ROIs were draw over left (red) and right (blue) tibialis cranialis. (c) Representative images acquired with the UTE sequence, at different echo times (left, TE1 = 0.012 ms, TE4 = 0.5 ms, TE8 = 1.2 ms). The mean signal in ROIs draw over each tibialis cranialis was fitted to a bi-exponential decay with an off-resonance component (right).

**Supplementary Figure S3.**

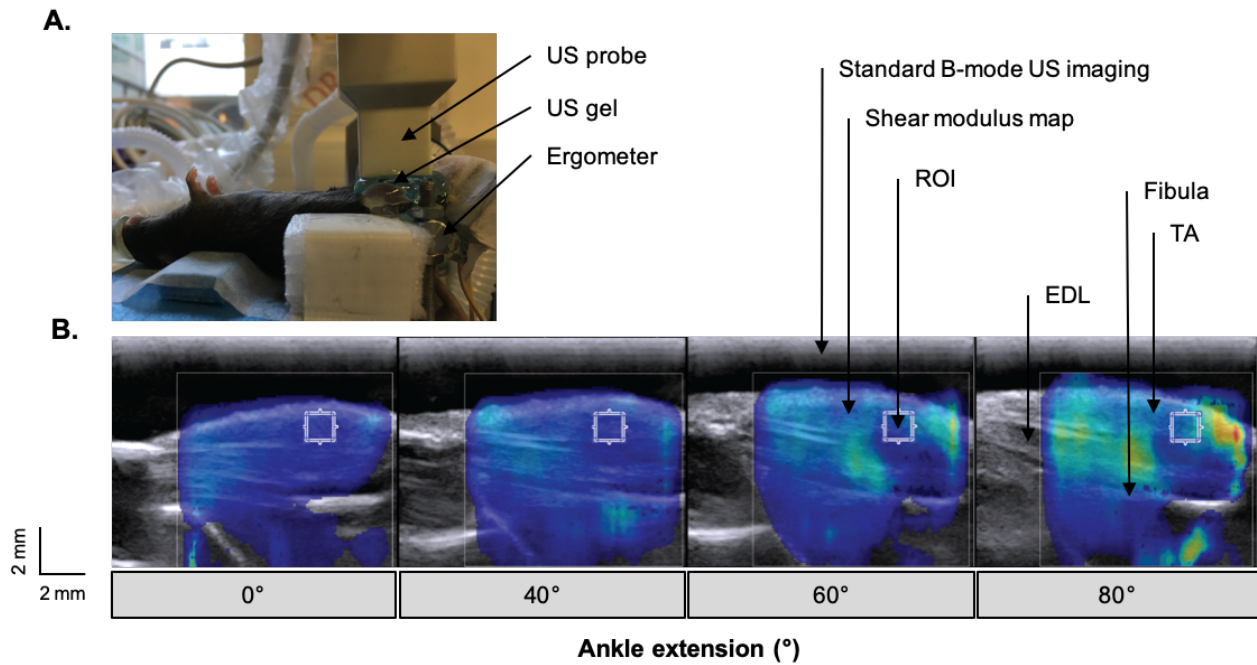

Supplementary Figure S3. *Experimental setup for shear-wave elastography.* (A) Mouse and probe positioning for standardized ultrasound shear-modulus measurements. (B) Shear-modulus and standard B-mode ultrasound images were acquired at different ankle extension positions, to allow dynamic assessment of muscle viscoelastic properties. Mean SM at each angle was extracted by placing a square region of interest (ROI) within the proximal third portion of the tibialis cranialis.

**Supplementary Table S1:** Correlations and partial correlations between collagen fraction and non-invasive NMR and SWE metrics.

| Modality &<br>Metric            | Correlation    |              |                     |              |              |           | Partial correlation                |              |                     |           |              |              |          |
|---------------------------------|----------------|--------------|---------------------|--------------|--------------|-----------|------------------------------------|--------------|---------------------|-----------|--------------|--------------|----------|
|                                 | Total collagen |              | Endomysial collagen |              |              |           | Total collagen                     |              | Endomysial collagen |           |              |              |          |
|                                 | <i>R</i>       | <i>p</i>     | <i>R</i>            | <i>p</i>     | <i>R</i>     | <i>p</i>  | <i>R'</i>                          | <i>p</i>     | <i>R'</i>           | <i>p</i>  | <i>R'</i>    | <i>p</i>     |          |
| T <sub>1</sub> -maps            |                |              |                     |              |              |           |                                    |              |                     |           |              |              |          |
| <i>native-T<sub>1</sub></i>     | 0.30           | 0.079        | 0.18                | 0.281        |              |           | <i>native-T<sub>1</sub></i>        | 0.29         | 0.097               | 0.17      | 0.357        |              |          |
| <b><i>ECV</i></b>               | <b>0.50</b>    | <b>0.002</b> | <b>**</b>           | <b>0.46</b>  | <b>0.005</b> | <b>**</b> | <b><i>ECV</i></b>                  | <b>0.38</b>  | <b>0.028</b>        | <b>*</b>  | 0.30         | 0.085        |          |
| T <sub>2</sub> -map             |                |              |                     |              |              |           |                                    |              |                     |           |              |              |          |
| <b><i>MRI-T<sub>2</sub></i></b> | <b>-0.48</b>   | <b>0.003</b> | <b>**</b>           | <b>-0.37</b> | <b>0.027</b> | <b>*</b>  | <b><i>T<sub>2</sub></i></b>        | <b>-0.50</b> | <b>0.003</b>        | <b>**</b> | <b>-0.36</b> | <b>0.042</b> | <b>*</b> |
| CPMG                            |                |              |                     |              |              |           |                                    |              |                     |           |              |              |          |
| <i>T<sub>2s</sub></i>           | -0.14          | 0.399        |                     | -0.14        | 0.422        |           | <i>T<sub>2s</sub></i>              | -0.10        | 0.587               |           | -0.08        | 0.649        |          |
| <i>T<sub>2i</sub></i>           | -0.04          | 0.838        |                     | -0.03        | 0.874        |           | <i>T<sub>2i</sub></i>              | -0.21        | 0.232               |           | -0.20        | 0.262        |          |
| <i>T<sub>2l</sub></i>           | -0.13          | 0.435        |                     | -0.16        | 0.366        |           | <i>T<sub>2l</sub></i>              | -0.21        | 0.238               |           | -0.22        | 0.215        |          |
| <i>T<sub>2s-Fr</sub></i>        | -0.14          | 0.402        |                     | -0.13        | 0.447        |           | <i>T<sub>2s-Fr</sub></i>           | -0.28        | 0.113               |           | -0.24        | 0.186        |          |
| <i>T<sub>2i-Fr</sub></i>        | -0.10          | 0.548        |                     | -0.04        | 0.833        |           | <i>T<sub>2i-Fr</sub></i>           | -0.08        | 0.671               |           | 0.00         | 0.988        |          |
| UTE                             |                |              |                     |              |              |           |                                    |              |                     |           |              |              |          |
| <i>T<sub>2</sub>*s-Fr</i>       | -0.01          | 0.937        |                     | -0.08        | 0.661        |           | <i>T<sub>2</sub>*s-Fr</i>          | -0.07        | 0.679               |           | -0.19        | 0.277        |          |
| <i>T<sub>2</sub>*-short</i>     | 0.18           | 0.306        |                     | 0.21         | 0.213        |           | <b><i>T<sub>2</sub>*-short</i></b> | 0.26         | 0.144               |           | <b>0.36</b>  | <b>0.038</b> | <b>*</b> |
| <i>T<sub>2</sub>*-long</i>      | -0.15          | 0.383        |                     | -0.25        | 0.148        |           | <i>T<sub>2</sub>*-long</i>         | 0.10         | 0.589               |           | -0.05        | 0.776        |          |
| High-res T <sub>1</sub> w       |                |              |                     |              |              |           |                                    |              |                     |           |              |              |          |
| <i>Skewness</i>                 | -0.20          | 0.254        |                     | -0.12        | 0.500        |           | <i>Skewness</i>                    | -0.11        | 0.542               |           | 0.01         | 0.952        |          |
| <b><i>Kurtosis</i></b>          | <b>0.33</b>    | <b>0.046</b> | <b>*</b>            | <b>0.42</b>  | <b>0.010</b> | <b>*</b>  | <b><i>Kurtosis</i></b>             | 0.28         | 0.121               |           | <b>0.36</b>  | <b>0.039</b> | <b>*</b> |
| <b><i>Energy</i></b>            | 0.22           | 0.206        |                     | <b>0.35</b>  | <b>0.037</b> | <b>*</b>  | <i>Energy</i>                      | 0.13         | 0.460               |           | 0.28         | 0.116        |          |
| SWE                             |                |              |                     |              |              |           |                                    |              |                     |           |              |              |          |
| <i>SM<sub>0</sub></i>           | 0.06           | 0.747        |                     | 0.09         | 0.622        |           | <b><i>SM<sub>0</sub></i></b>       | 0.31         | 0.076               |           | <b>0.38</b>  | <b>0.031</b> | <b>*</b> |
| <i>SM<sub>40</sub></i>          | 0.06           | 0.730        |                     | 0.09         | 0.632        |           | <i>SM<sub>40</sub></i>             | -0.06        | 0.748               |           | -0.02        | 0.919        |          |
| <i>SM<sub>60</sub></i>          | 0.16           | 0.390        |                     | 0.16         | 0.388        |           | <i>SM<sub>60</sub></i>             | 0.06         | 0.748               |           | 0.07         | 0.711        |          |

|                               |             |              |           |             |              |          |                               |             |              |          |             |              |          |
|-------------------------------|-------------|--------------|-----------|-------------|--------------|----------|-------------------------------|-------------|--------------|----------|-------------|--------------|----------|
| <b><i>SM<sub>80</sub></i></b> | <b>0.46</b> | <b>0.009</b> | <b>**</b> | <b>0.45</b> | <b>0.011</b> | <b>*</b> | <b><i>SM<sub>80</sub></i></b> | <b>0.35</b> | <b>0.044</b> | <b>*</b> | <b>0.35</b> | <b>0.047</b> | <b>*</b> |
| <b><i>SMi</i></b>             | <b>0.41</b> | <b>0.019</b> | <b>*</b>  | <b>0.35</b> | <b>0.049</b> | <b>*</b> | <b><i>SMi</i></b>             | 0.21        | 0.233        |          | 0.13        | 0.479        |          |

---

*T<sub>2s</sub>-Fr*: Fraction of the signal with short-*T<sub>2</sub>* in CPMG data; *T<sub>2i</sub>-Fr*: fraction of the signal with intermediary-*T<sub>2</sub>* in CPMG; *T<sub>2s</sub>, T<sub>2i</sub>, T<sub>2l</sub>*: short-, intermediary- and long- *T<sub>2</sub>*, estimated from ISIS-CPMG data. *SWE*: shear wave elastography; *SM*: shear modulus at different angles of plantar flexion; *SMi*: viscoelastic index. Significant correlations are highlighted in bold. \**p*<0.05, \*\**p*<0.01



**Supplementary Table S2:**  $T_2$  values and fractions estimated from ISIS-CPMG data

|                                | Injured         | Control         | Paired difference | p-value |
|--------------------------------|-----------------|-----------------|-------------------|---------|
| <i>T<sub>2s</sub></i>          |                 |                 |                   |         |
| <i>all</i>                     | 2.4 (3.5) ms    | 4.2 (7.0) ms    | -2.0 (5.7) ms     | 0.17    |
| <i>DBA/2J</i>                  | 1.0 (2.7) ms    | 4.0 (5.3) ms    | -1.2 (4.7) ms     | 0.41    |
| <i>C57BL/6</i>                 | 3.1 (3.2) ms    | 5.6 (5.5) ms    | -3.2 (4.9) ms     | 0.22    |
| <i>T<sub>2s</sub> fraction</i> |                 |                 |                   |         |
| <i>all</i>                     | 5.3 (3.3) %     | 5.5 (8.0) %     | -1.3 (8.8) %      | 0.64    |
| <i>DBA/2J</i>                  | 5.6 (9.2) %     | 6.0 (7.1) %     | -3.3 (10.9) %     | 1.00    |
| <i>C57BL/6</i>                 | 5.1 (2.0) %     | 5.0 (5.8)%      | -0.5 (8.2) %      | 0.81    |
| <i>T<sub>2i</sub></i>          |                 |                 |                   |         |
| <i>all</i>                     | 25.4 (1.9) ms   | 24.7 (1.5) ms   | 0.7 (2.6) ms      | 0.37    |
| <i>DBA/2J</i>                  | 24.6 (2.1) ms   | 24.7 (1.4) ms   | 1.0 (2.7) ms      | 0.32    |
| <i>C57BL/6</i>                 | 25.6 (0.9) ms   | 24.6 (2.2) ms   | 0.4 (2.4) ms      | 0.94    |
| <i>T<sub>2i</sub> fraction</i> |                 |                 |                   |         |
| <i>all</i>                     | 89.2(6.5) %     | 88.2(6.2) %     | 1.1(8.7) %        | 0.58    |
| <i>DBA/2J</i>                  | 86.9 (4.3) %    | 86.5 (5.9) %    | 0.9 (7.8) %       | 0.83    |
| <i>C57BL/6</i>                 | 91.1 (4.8) %    | 89.8 (5.3) %    | 4.0 (9.4) %       | 0.47    |
| <i>T<sub>2l</sub></i>          |                 |                 |                   |         |
| <i>all</i>                     | 97.7 (69.0) ms  | 103.1 (30.7) ms | 2.0 (74.8) ms     | 0.87    |
| <i>DBA/2J</i>                  | 127.3 (70.3) ms | 103.1 (25.1) ms | 13.4 (71.2) ms    | 0.46    |
| <i>C57BL/6</i>                 | 96.7 (26.1) ms  | 115.0 (68.5) ms | -9.3 (101.7) ms   | 0.69    |
| <i>T<sub>2l</sub> fraction</i> |                 |                 |                   |         |
| <i>all</i>                     | 3.5 (4.0) %     | 4.3 (2.3) %     | -0.4 (6.6) %      | 0.90    |
| <i>DBA/2J</i>                  | 4.3 (4.2) %     | 4.4 (1.7) %     | -0.4 (5.8) %      | 0.76    |
| <i>C57BL/6</i>                 | 2.8 (3.1) %     | 3.2 (3.1) %     | -0.4 (5.9) %      | 0.81    |

*T<sub>2s</sub>, T<sub>2i</sub>, T<sub>2l</sub>*: short-, intermediary- and long- $T_2$  estimated from ISIS-CPMG data fitted to a tri-exponential model.

**Supplementary Table S3:** Texture analysis using histogram features from T<sub>1</sub>-weighted high resolution images.

|                                 | Injured     | Control     | Paired difference | p-value |
|---------------------------------|-------------|-------------|-------------------|---------|
| <i>Skewness</i>                 |             |             |                   |         |
| <i>all</i>                      | 0.34 (0.85) | 0.56 (0.80) | -0.35 (1.11)      | 0.26    |
| <i>DBA/2J</i>                   | 0.36 (1.14) | 0.46 (0.73) | -0.20 (1.29)      | 0.37    |
| <i>C57Bl/6</i>                  | 0.34 (0.81) | 0.84 (0.39) | -0.49 (1.12)      | 0.81    |
| <i>Kurtosis</i>                 |             |             |                   |         |
| <i>all</i>                      | 4.7 (2.8)   | 3.6 (0.7)   | 1.57 (3.35)       | 0.03 *  |
| <i>DBA/2J</i>                   | 4.6 (2.7)   | 3.5 (0.7)   | 1.66 (3.26)       | 0.17    |
| <i>C57Bl/6</i>                  | 5.3 (2.8)   | 3.9 (0.6)   | 1.49 (3.19)       | 0.11    |
| <i>Energy (x10<sup>3</sup>)</i> |             |             |                   |         |
| <i>all</i>                      | 11.1 (3.2)  | 9.5 (2.5)   | 1.4 (4.0)         | 0.02 *  |
| <i>DBA/2J</i>                   | 10.8 (3.0)  | 9.6 (3.1)   | 1.0 (4.2)         | 0.24    |
| <i>C57Bl/6</i>                  | 13.3 (3.4)  | 9.4 (1.7)   | 1.8 (4.0)         | 0.015 * |

Data is presented as median (inter-quartile range). \*:  $p < 0.05$

**Supplementary Table S4:** Shear modulus (SM) at different plantar flexion angles and viscoelastic index in fibrotic (injured) and normal muscle.

|                              | Injured     | Control     | Paired difference | p-value |
|------------------------------|-------------|-------------|-------------------|---------|
| <i>SM<sub>0</sub> (kPa)</i>  |             |             |                   |         |
| <i>all</i>                   | 24.7 (7.1)  | 27.0 (8.0)  | -2.7 (8.6)        | 0.23    |
| <i>DBA/2J</i>                | 25.3 (8.1)  | 29.5 (5.7)  | -4.2 (3.7)        | 0.02 *  |
| <i>C57BL/6</i>               | 24.7 (4.2)  | 23.2 (5.2)  | 3.2 (6.4)         | 0.56    |
| <i>SM<sub>40</sub> (kPa)</i> |             |             |                   |         |
| <i>all</i>                   | 33.9(4.9)   | 30.0(7.9)   | 3.7(11.7)         | 0.35    |
| <i>DBA/2J</i>                | 32.8 (7.3)  | 33.9 (10.0) | -1.0 (10.3)       | 0.70    |
| <i>C57BL/6</i>               | 34.8 (2.5)  | 27.8 (1.0)  | 5.8 (5.9)         | 0.03 *  |
| <i>SM<sub>60</sub> (kPa)</i> |             |             |                   |         |
| <i>all</i>                   | 46.6(11.2)  | 38.8(11.7)  | 4.7(16.4)         | 0.13    |
| <i>DBA/2J</i>                | 46.4 (15.5) | 44.0 (14.7) | 0.3 (22.3)        | 0.77    |
| <i>C57BL/6</i>               | 44.0 (10.5) | 34.0 (3.4)  | 10.2 (12.5)       | 0.03 *  |
| <i>SM<sub>80</sub> (kPa)</i> |             |             |                   |         |
| <i>all</i>                   | 54.4(16.0)  | 44.6(21.5)  | 8.3(24.9)         | 0.07    |
| <i>DBA/2J</i>                | 62.5 (18.2) | 54.5 (20.3) | 3.1 (31.6)        | 0.49    |
| <i>C57BL/6</i>               | 49.3 (7.5)  | 36.0 (9.3)  | 13.4 (6.8)        | 0.06    |
| <i>SM<sub>i</sub> (a.u.)</i> |             |             |                   |         |
| <i>all</i>                   | 1.17(0.99)  | 0.67(0.44)  | 0.29(0.86)        | 0.02 *  |
| <i>DBA/2J</i>                | 1.55 (0.93) | 0.93 (0.39) | 0.35 (1.08)       | 0.11    |
| <i>C57BL/6</i>               | 0.73 (0.35) | 0.58 (0.32) | 0.23 (0.54)       | 0.16`   |

*SM<sub>i</sub>* is the normalized difference between SM at 80° (*SM<sub>80</sub>*) and SM at rest (*SM<sub>0</sub>*). \*: *p*<0.05 in paired comparisons between injured and control muscles in the same mouse.
